# Supplementary material
Source: MDPI journal article supplement (https://www.mdpi.com/2673-8015/2/1/2)
Supplement: s1 [file s1]

# Supporting Information for

## Experimental and Computational Study of the Properties of Imidazole Compounds with Branched and Cycloalkyl Substituents

Shuai Qian<sup>1</sup>, Patrick Mileski<sup>1</sup>, A. Christopher Irvin,<sup>1</sup> Ademola Soyemi<sup>1</sup>, Tibor Szilvási<sup>1</sup>, and Jason E. Bara<sup>1,\*</sup>

Department of Chemical & Biological Engineering, University of Alabama, Tuscaloosa, AL, 35487-0203, USA

\*Corresponding author email address: [jbara@eng.ua.edu](mailto:jbara@eng.ua.edu)

### Contents:

Table S1. Compilation of densities ( $\rho$ ) of linear alkyl imidazoles at different temperatures ( $T$ ) and  $P = 101$  kPa

Table S2. Dynamic viscosities ( $\eta$ ) of imidazole compounds from measurements and COSMOtherm calculations at different temperatures ( $T$ ) and  $P = 101$  kPa

Table S3. Compilation of viscosities ( $\eta$ ) of linear alkyl imidazoles at different temperatures ( $T$ ) and  $P = 101$  kPa

Table S4. Vapor pressure ( $P$ ) and enthalpies of vaporization ( $\Delta H$ ) of imidazole compounds from measurements and COSMOtherm calculations at different temperatures ( $T$ )

**Table S1:** Compilation of densities ( $\rho$ ) of linear alkyl imidazoles at different temperatures ( $T$ ) and  $P = 101$  kPa [1].

| $\frac{T}{K}$ | $\frac{\rho}{g \cdot cm^{-3}}$ |                  |                   |                  |
|---------------|--------------------------------|------------------|-------------------|------------------|
|               | 1-propylimidazole              | 1-butylimidazole | 1-pentylimidazole | 1-octylimidazole |
| 293.15        | 0.9729                         | 0.9514           | 0.9389            | 0.9115           |
| 303.15        | 0.9646                         | 0.9434           | 0.9311            | 0.9043           |
| 313.15        | 0.9562                         | 0.9354           | 0.9233            | 0.8971           |
| 323.15        | 0.9479                         | 0.9274           | 0.9156            | 0.8898           |
| 333.15        | 0.9395                         | 0.9194           | 0.9078            | 0.8826           |
| 343.15        | 0.9311                         | 0.9113           | 0.8999            | 0.8753           |
| 353.15        | 0.9227                         | 0.9032           | 0.8921            | 0.8680           |

**Table S2:** Dynamic viscosities ( $\eta$ ) of imidazole compounds from measurements and COSMOtherm calculations at different temperatures ( $T$ ) and  $P = 101$  kPa.<sup>a</sup>

| $\frac{T}{K}$                    | $\frac{\eta_m^b}{mPa \cdot s}$ | $\frac{\eta_c^c}{mPa \cdot s}$ | $\frac{Error^d}{\%}$ | $\frac{T}{K}$                            | $\frac{\eta_m}{mPa \cdot s}$ | $\frac{\eta_c}{mPa \cdot s}$ | $\frac{Error}{\%}$ |
|----------------------------------|--------------------------------|--------------------------------|----------------------|------------------------------------------|------------------------------|------------------------------|--------------------|
| (1) <i>N</i> -isopropylimidazole |                                |                                |                      | (2) <i>N</i> -isobutylimidazole          |                              |                              |                    |
| 293.15                           | 3.11                           | 2.38                           | 23.42                | 293.15                                   | 4.76                         | 2.85                         | 40.21              |
| 298.15                           | 2.74                           | 2.14                           | 21.76                | 298.15                                   | 4.08                         | 2.55                         | 37.57              |
| 303.15                           | 2.46                           | 1.94                           | 21.28                | 303.15                                   | 3.54                         | 2.29                         | 35.36              |
| 308.15                           | 2.20                           | 1.75                           | 20.23                | 308.15                                   | 3.10                         | 2.06                         | 33.46              |
| 313.15                           | 1.99                           | 1.60                           | 19.83                | 313.15                                   | 2.75                         | 1.87                         | 32.16              |
| 318.15                           | 1.80                           | 1.45                           | 19.18                | 318.15                                   | 2.45                         | 1.69                         | 30.91              |
| 323.15                           | 1.64                           | 1.33                           | 18.88                | 323.15                                   | 2.18                         | 1.54                         | 29.33              |
| 333.15                           | 1.35                           | 1.12                           | 16.93                | 333.15                                   | 1.78                         | 1.29                         | 27.71              |
| 343.15                           | 1.10                           | 0.95                           | 13.20                | 343.15                                   | 1.50                         | 1.09                         | 27.59              |
| 353.15                           | 0.93                           | 0.82                           | 11.79                | 353.15                                   | 1.21                         | 0.93                         | 23.50              |
| (3) <i>N</i> -sec-butylimidazole |                                |                                |                      | (4) <i>N</i> -cyclopropylmethylimidazole |                              |                              |                    |
| 293.15                           | 4.22                           | 2.81                           | 33.45                | 293.15                                   | 7.06                         | 3.78                         | 46.40              |
| 298.15                           | 3.62                           | 2.51                           | 30.53                | 298.15                                   | 6.00                         | 3.36                         | 44.06              |
| 303.15                           | 3.15                           | 2.26                           | 28.25                | 303.15                                   | 5.14                         | 2.99                         | 41.85              |
| 308.15                           | 2.75                           | 2.04                           | 25.88                | 308.15                                   | 4.48                         | 2.67                         | 40.37              |
| 313.15                           | 2.45                           | 1.84                           | 24.73                | 313.15                                   | 3.94                         | 2.40                         | 39.17              |
| 318.15                           | 2.19                           | 1.67                           | 23.57                | 318.15                                   | 3.49                         | 2.16                         | 38.19              |

|                                   |      |      |       |                                        |             |      |       |
|-----------------------------------|------|------|-------|----------------------------------------|-------------|------|-------|
| 323.15                            | 1.95 | 1.52 | 21.85 | 323.15                                 | 3.12        | 1.95 | 37.56 |
| 333.15                            | 1.60 | 1.27 | 20.39 | 333.15                                 | 2.55        | 1.60 | 37.12 |
| 343.15                            | 1.32 | 1.08 | 18.50 | 343.15                                 | 2.15        | 1.33 | 37.92 |
| 353.15                            | 0.99 | 0.92 | 7.34  | 353.15                                 | 1.87        | 1.12 | 39.96 |
| <b>(5) N-cyclopentylimidazole</b> |      |      |       | <b>(6) N-cyclohexylmethylimidazole</b> |             |      |       |
| 293.15                            | 7.16 | 5.00 | 30.16 | 293.15                                 | N/A (Solid) |      |       |
| 298.15                            | 6.17 | 4.40 | 28.75 | 298.15                                 | N/A (Solid) |      |       |
| 303.15                            | 5.34 | 3.88 | 27.31 | 303.15                                 | N/A (Solid) |      |       |
| 308.15                            | 4.68 | 3.44 | 26.48 | 308.15                                 | N/A (Solid) |      |       |
| 313.15                            | 4.13 | 3.06 | 25.86 | 313.15                                 | N/A (Solid) |      |       |
| 318.15                            | 3.65 | 2.73 | 25.07 | 318.15                                 | N/A (Solid) |      |       |
| 323.15                            | 3.27 | 2.45 | 25.04 | 323.15                                 | 11.42       | 3.63 | 68.22 |
| 333.15                            | 2.67 | 1.99 | 25.52 | 333.15                                 | 7.94        | 2.87 | 63.82 |
| 343.15                            | 2.24 | 1.63 | 27.09 | 343.15                                 | 5.83        | 2.30 | 60.46 |
| 353.15                            | 1.91 | 1.36 | 28.99 | 353.15                                 | 4.45        | 1.87 | 57.92 |

<sup>a</sup>Temperature variance is +/-0.01 K. Viscosity measurements variance is +/- 0.1% of the reported value

<sup>b</sup>Measured viscosity

<sup>c</sup>COSMOtherm calculated viscosity

<sup>d</sup>Error =  $\frac{\eta_m - \eta_c}{\eta_c} * 100$

**Table S3:** Compilation of viscosities ( $\eta$ ) of linear alkyl imidazoles at different temperatures ( $T$ ) and  $P = 101$  kPa [1].

| $\frac{T}{K}$ | $\frac{\eta}{mPa \cdot s}$ |                  |                   |                  |
|---------------|----------------------------|------------------|-------------------|------------------|
|               | 1-propylimidazole          | 1-butylimidazole | 1-pentylimidazole | 1-octylimidazole |
| 293.15        | 3.17                       | 3.95             | 5.13              | 9.17             |
| 298.15        | 2.81                       | 3.47             | 4.49              | 7.77             |
| 303.15        | 2.50                       | 3.05             | 3.89              | 6.56             |
| 308.15        | 2.26                       | 2.71             | 3.42              | 5.63             |
| 313.15        | 2.05                       | 2.43             | 3.02              | 4.87             |
| 318.15        | 1.86                       | 2.19             | 2.70              | 4.25             |
| 323.15        | 1.69                       | 1.99             | 2.42              | 3.76             |
| 333.15        | 1.45                       | 1.66             | 2.00              | 3.00             |
| 343.15        | 1.25                       | 1.43             | 1.68              | 2.44             |
| 353.15        | 1.23                       | 1.42             | 1.43              | 2.04             |

**Table S4:** Vapor pressure ( $P$ ) and enthalpies of vaporization ( $\Delta H$ ) of imidazole compounds from measurements and COSMOtherm calculations at different temperatures ( $T$ ).<sup>a</sup>

| Compound | $\frac{T}{K}$ | $\frac{P_m^b}{Pa}$ | $\frac{P_c^c}{Pa}$ | $\frac{\text{Error}(P)^d}{\%}$ | $\frac{\Delta H_{vap}^m^e}{kJ \cdot mol^{-1}}$ | $\frac{\Delta H_{vap}^c^f}{kJ \cdot mol^{-1}}$ | $\frac{\text{Error}(\Delta H_{vap})^g}{\%}$ |
|----------|---------------|--------------------|--------------------|--------------------------------|------------------------------------------------|------------------------------------------------|---------------------------------------------|
| 1        | 283.4         | 5.04               | 5.23               | -3.74                          | 59.39                                          | 54.61                                          | 8.04                                        |
|          | 286.5         | 6.62               | 6.72               | -1.47                          | 59.18                                          | 54.52                                          | 7.88                                        |
|          | 289.4         | 8.51               | 8.45               | 0.74                           | 58.98                                          | 54.43                                          | 7.72                                        |
|          | 292.4         | 10.89              | 10.65              | 2.19                           | 58.77                                          | 54.33                                          | 7.55                                        |
|          | 295.3         | 13.80              | 13.26              | 3.89                           | 58.58                                          | 54.24                                          | 7.41                                        |
|          | 298.2         | 16.97              | 16.44              | 3.13                           | 58.37                                          | 54.15                                          | 7.23                                        |
|          | 303.1         | 24.51              | 23.39              | 4.58                           | 58.04                                          | 53.99                                          | 6.97                                        |
|          | 304.5         | 28.32              | 25.81              | 8.87                           | 57.95                                          | 53.95                                          | 6.90                                        |
|          | 306.0         | 31.02              | 28.65              | 7.65                           | 57.84                                          | 53.90                                          | 6.81                                        |
|          | 309.0         | 40.17              | 35.18              | 12.41                          | 57.64                                          | 53.81                                          | 6.65                                        |
|          | 312.0         | 49.53              | 43.02              | 13.14                          | 57.43                                          | 53.71                                          | 6.48                                        |
|          | 314.1         | 56.73              | 49.41              | 12.91                          | 57.29                                          | 53.64                                          | 6.37                                        |
|          | 316.0         | 64.34              | 55.90              | 13.12                          | 57.15                                          | 53.58                                          | 6.25                                        |
|          | 318.0         | 74.82              | 63.54              | 15.07                          | 57.01                                          | 53.52                                          | 6.13                                        |
|          | 320.0         | 84.70              | 72.11              | 14.87                          | 56.88                                          | 53.45                                          | 6.03                                        |
|          | 321.0         | 90.13              | 76.76              | 14.83                          | 56.81                                          | 53.42                                          | 5.97                                        |
|          | 323.0         | 103.60             | 86.88              | 16.14                          | 56.67                                          | 53.35                                          | 5.85                                        |
| 2        | 289.6         | 4.42               | 4.37               | 1.07                           | 62.81                                          | 56.97                                          | 9.30                                        |
|          | 292.6         | 5.85               | 5.57               | 4.75                           | 62.57                                          | 56.88                                          | 9.10                                        |
|          | 295.6         | 7.50               | 7.06               | 5.83                           | 62.34                                          | 56.78                                          | 8.91                                        |
|          | 298.3         | 9.55               | 8.70               | 8.85                           | 62.14                                          | 56.70                                          | 8.75                                        |
|          | 301.2         | 12.07              | 10.85              | 10.14                          | 61.91                                          | 56.61                                          | 8.56                                        |
|          | 302.5         | 13.16              | 11.95              | 9.18                           | 61.81                                          | 56.57                                          | 8.48                                        |
|          | 303.2         | 13.91              | 12.59              | 9.50                           | 61.76                                          | 56.55                                          | 8.44                                        |
|          | 306.0         | 17.49              | 15.45              | 11.64                          | 61.55                                          | 56.46                                          | 8.28                                        |
|          | 307.1         | 19.30              | 16.73              | 13.31                          | 61.46                                          | 56.42                                          | 8.20                                        |
|          | 308.1         | 20.50              | 17.98              | 12.31                          | 61.39                                          | 56.39                                          | 8.15                                        |
|          | 309.2         | 22.80              | 19.44              | 14.74                          | 61.30                                          | 56.35                                          | 8.07                                        |
|          | 310.0         | 24.06              | 20.57              | 14.50                          | 61.24                                          | 56.33                                          | 8.02                                        |
|          | 311.3         | 26.08              | 22.54              | 13.59                          | 61.14                                          | 56.29                                          | 7.94                                        |
|          | 311.4         | 27.01              | 22.69              | 15.98                          | 61.13                                          | 56.28                                          | 7.93                                        |
|          | 313.3         | 30.71              | 25.89              | 15.70                          | 60.99                                          | 56.22                                          | 7.82                                        |
|          | 314.2         | 33.17              | 27.54              | 16.97                          | 60.92                                          | 56.19                                          | 7.76                                        |
|          | 316.6         | 38.96              | 32.41              | 16.80                          | 60.73                                          | 56.12                                          | 7.60                                        |

|   |       |        |       |        |       |       |       |
|---|-------|--------|-------|--------|-------|-------|-------|
|   | 317.1 | 40.21  | 33.52 | 16.63  | 60.69 | 56.10 | 7.56  |
|   | 319.1 | 47.08  | 38.30 | 18.65  | 60.54 | 56.03 | 7.44  |
|   | 319.2 | 47.83  | 38.56 | 19.39  | 60.53 | 56.03 | 7.43  |
|   | 320.4 | 51.47  | 41.73 | 18.93  | 60.44 | 55.99 | 7.36  |
|   | 322.1 | 58.12  | 46.62 | 19.79  | 60.31 | 55.94 | 7.25  |
|   | 323.2 | 63.21  | 50.05 | 20.81  | 60.22 | 55.90 | 7.17  |
|   | 324.0 | 67.39  | 52.69 | 21.81  | 60.16 | 55.87 | 7.13  |
|   | 324.4 | 68.34  | 54.06 | 20.90  | 60.13 | 55.86 | 7.10  |
|   | 326.1 | 78.34  | 60.21 | 23.14  | 60.00 | 55.80 | 6.99  |
| 3 | 295.7 | 7.11   | 6.84  | 3.78   | 64.78 | 56.81 | 12.31 |
|   | 298.4 | 8.99   | 8.43  | 6.22   | 64.57 | 56.72 | 12.16 |
|   | 301.7 | 11.98  | 10.82 | 9.66   | 64.32 | 56.61 | 11.98 |
|   | 304.4 | 14.84  | 13.22 | 10.92  | 64.11 | 56.52 | 11.83 |
|   | 307.6 | 19.39  | 16.67 | 14.01  | 63.86 | 56.42 | 11.65 |
|   | 310.3 | 23.75  | 20.20 | 14.95  | 63.65 | 56.33 | 11.50 |
|   | 314.3 | 32.90  | 26.66 | 18.96  | 63.35 | 56.20 | 11.28 |
|   | 316.8 | 39.32  | 31.59 | 19.66  | 63.16 | 56.12 | 11.15 |
|   | 317.0 | 40.65  | 32.02 | 21.24  | 63.14 | 56.11 | 11.13 |
|   | 320.1 | 51.73  | 39.34 | 23.95  | 62.90 | 56.01 | 10.96 |
|   | 324.3 | 69.99  | 51.65 | 26.21  | 62.58 | 55.87 | 10.72 |
|   | 324.5 | 70.09  | 52.31 | 25.37  | 62.56 | 55.86 | 10.71 |
|   | 326.3 | 80.12  | 58.64 | 26.81  | 62.42 | 55.80 | 10.60 |
|   | 328.4 | 93.00  | 66.87 | 28.09  | 62.26 | 55.73 | 10.49 |
|   | 330.2 | 105.33 | 74.74 | 29.04  | 62.13 | 55.67 | 10.40 |
| 4 | 303.0 | 3.70   | 7.25  | -95.88 | 59.49 | 57.46 | 3.42  |
|   | 305.4 | 4.54   | 8.67  | -90.95 | 59.32 | 57.38 | 3.27  |
|   | 308.2 | 5.48   | 10.64 | -94.21 | 59.12 | 57.29 | 3.09  |
|   | 309.3 | 5.99   | 11.52 | -92.38 | 59.04 | 57.26 | 3.02  |
|   | 311.3 | 6.98   | 13.29 | -90.46 | 58.90 | 57.19 | 2.90  |
|   | 312.2 | 7.39   | 14.17 | -91.73 | 58.83 | 57.16 | 2.83  |
|   | 314.2 | 8.43   | 16.30 | -93.35 | 58.69 | 57.10 | 2.71  |
|   | 316.8 | 9.98   | 19.50 | -95.38 | 58.50 | 57.01 | 2.54  |
|   | 317.2 | 10.4   | 20.04 | -92.68 | 58.47 | 57.00 | 2.51  |
|   | 320.2 | 12.76  | 24.53 | -92.26 | 58.26 | 56.90 | 2.33  |
|   | 320.3 | 12.75  | 24.70 | -93.70 | 58.25 | 56.90 | 2.32  |
|   | 323.1 | 15.55  | 29.71 | -91.09 | 58.05 | 56.81 | 2.14  |
|   | 325.5 | 18.34  | 34.72 | -89.34 | 57.88 | 56.73 | 1.99  |
|   | 329.1 | 23.29  | 43.66 | -87.47 | 57.62 | 56.61 | 1.76  |
|   | 331.5 | 27.09  | 50.71 | -87.20 | 57.45 | 56.53 | 1.61  |

|   |       |       |        |        |       |       |       |
|---|-------|-------|--------|--------|-------|-------|-------|
|   | 334.3 | 31.87 | 60.21  | -88.91 | 57.24 | 56.43 | 1.41  |
|   | 337.5 | 39.17 | 72.97  | -86.30 | 57.01 | 56.32 | 1.21  |
|   | 340.4 | 47.33 | 86.57  | -82.91 | 56.81 | 56.22 | 1.03  |
|   | 343.3 | 56.46 | 102.37 | -81.32 | 56.60 | 56.12 | 0.84  |
|   | 305.0 | 2.42  | 2.16   | 10.79  | 70.10 | 61.53 | 12.23 |
|   | 308.0 | 3.19  | 2.73   | 14.29  | 69.87 | 61.43 | 12.08 |
|   | 310.8 | 3.90  | 3.39   | 13.00  | 69.65 | 61.34 | 11.93 |
|   | 312.7 | 4.64  | 3.92   | 15.54  | 69.51 | 61.27 | 11.85 |
|   | 313.6 | 5.06  | 4.19   | 17.13  | 69.44 | 61.24 | 11.80 |
|   | 316.9 | 6.37  | 5.35   | 15.95  | 69.19 | 61.13 | 11.64 |
|   | 317.8 | 6.92  | 5.72   | 17.37  | 69.12 | 61.10 | 11.60 |
|   | 318.8 | 7.44  | 6.15   | 17.37  | 69.04 | 61.07 | 11.54 |
| 5 | 321.2 | 9.10  | 7.30   | 19.76  | 68.86 | 60.99 | 11.43 |
|   | 321.5 | 9.41  | 7.46   | 20.73  | 68.83 | 60.98 | 11.40 |
|   | 324.2 | 11.73 | 9.02   | 23.12  | 68.62 | 60.89 | 11.27 |
|   | 324.8 | 12.44 | 9.40   | 24.42  | 68.58 | 60.87 | 11.24 |
|   | 327.9 | 15.79 | 11.63  | 26.32  | 68.34 | 60.76 | 11.09 |
|   | 328.3 | 16.52 | 11.95  | 27.64  | 68.31 | 60.75 | 11.07 |
|   | 330.9 | 20.43 | 14.24  | 30.32  | 68.11 | 60.66 | 10.94 |
|   | 334.0 | 24.61 | 17.47  | 29.03  | 67.87 | 60.55 | 10.78 |
|   | 336.9 | 30.09 | 21.07  | 29.98  | 67.65 | 60.45 | 10.64 |
|   | 340.1 | 39.46 | 25.81  | 34.60  | 67.40 | 60.34 | 10.48 |
|   | 343.2 | 48.81 | 31.29  | 35.90  | 67.16 | 60.23 | 10.32 |
|   | 346.1 | 58.67 | 37.34  | 36.36  | 66.94 | 60.13 | 10.18 |
|   | 314.0 | 1.12  | 0.86   | 23.66  | 76.17 | 67.47 | 11.42 |
|   | 316.6 | 1.43  | 1.06   | 26.08  | 75.95 | 67.38 | 11.29 |
|   | 323.0 | 2.52  | 1.75   | 30.40  | 75.41 | 67.15 | 10.95 |
|   | 323.1 | 2.55  | 1.77   | 30.69  | 75.41 | 67.15 | 10.96 |
|   | 326.0 | 3.24  | 2.21   | 31.88  | 75.16 | 67.04 | 10.80 |
|   | 319.9 | 1.95  | 1.38   | 29.43  | 75.67 | 67.26 | 11.11 |
| 6 | 329.0 | 4.07  | 2.77   | 32.06  | 74.91 | 66.94 | 10.64 |
|   | 325.8 | 3.23  | 2.17   | 32.69  | 75.18 | 67.05 | 10.81 |
|   | 330.8 | 4.80  | 3.16   | 34.19  | 74.76 | 66.87 | 10.55 |
|   | 334.9 | 6.65  | 4.25   | 36.05  | 74.42 | 66.72 | 10.35 |
|   | 340.9 | 10.67 | 6.48   | 39.28  | 73.92 | 66.50 | 10.04 |
|   | 343.8 | 13.46 | 7.90   | 41.34  | 73.67 | 66.39 | 9.89  |
|   | 343.9 | 13.78 | 7.95   | 42.32  | 73.66 | 66.38 | 9.88  |
|   | 346.8 | 16.86 | 9.65   | 42.76  | 73.42 | 66.27 | 9.73  |
|   | 349.9 | 21.23 | 11.83  | 44.29  | 73.17 | 66.15 | 9.59  |

|  |       |       |       |       |       |       |      |
|--|-------|-------|-------|-------|-------|-------|------|
|  | 352.8 | 26.47 | 14.26 | 46.14 | 72.92 | 66.04 | 9.43 |
|--|-------|-------|-------|-------|-------|-------|------|

---

<sup>a</sup>Uncertainties are  $u(T) = 0.1$  K and  $u(P) = 0.01$  Pa

<sup>b</sup>Measured vapor pressure [2]

<sup>c</sup>COSMOtherm calculated vapor pressure

<sup>d</sup> $\text{Error}(P) = \frac{P_m - P_c}{P_m} * 100$

<sup>e</sup>Enthalpy of vaporization from measurement

<sup>f</sup>Enthalpy of vaporization from COSMOtherm calculation

<sup>g</sup> $\text{Error}(\Delta H_{vap}) = \frac{\Delta H_{vap}^m - \Delta H_{vap}^n}{\Delta H_{vap}^m} * 100$

## References

1. Shannon, M. S.; Bara, J. E., Properties of Alkylimidazoles as Solvents for CO<sub>2</sub> Capture and Comparisons to Imidazolium-Based Ionic Liquids. *Industrial & Engineering Chemistry Research* **2011**, 50 (14), 8665-8677.
2. Verevkin, S. P.; Zaitseva, K. V.; Stanton, A. D.; Hindman, M. S.; Irvin, A. C.; Bara, J. E., Building Blocks for Ionic Liquids: Vapor Pressures and Vaporization Enthalpies of N-Functionalized Imidazoles with Branched and Cycloalkyl Substituents. *Industrial & Engineering Chemistry Research* **2015**, 54 (40), 9850-9856.
